# Supplementary material
Source: PubMed Central journal article supplement (PMC6057821)
Supplement: NIHMS973846-supplement-1.pdf [file NIHMS973846-supplement-1.pdf]

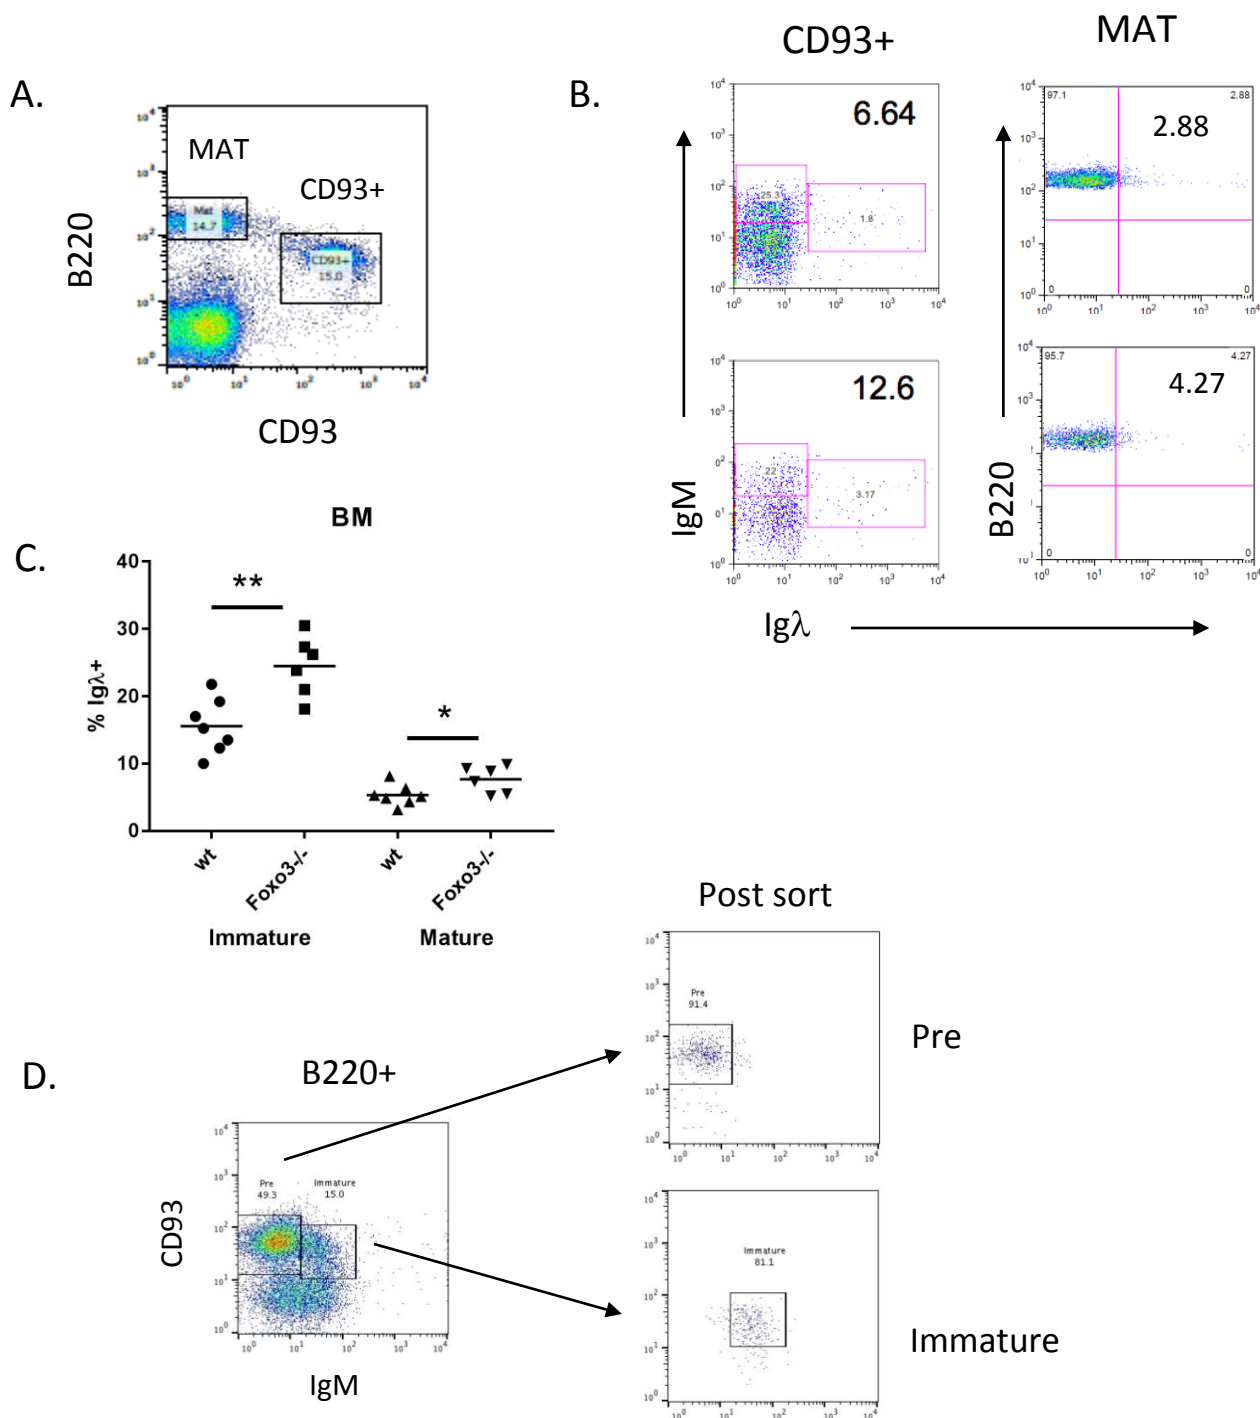

**Supplemental Figure 1: Representative FACS plots of bone marrow.** A,B) Bone marrow from mice on the FVB background was stained with antibodies against B220, CD93/AA4.1, IgM, and Igλ. The indicated populations in A) (gated on lymphocytes) were then analyzed for expression of Igλ as in B). B, left) Note that co-staining with antibodies against IgM and Igλ results in reduced binding of the anti-IgM antibody on Igλ positive cells. The frequency of Igλ+ cells among immature B cells (Igλ+ cells plus IgM+Igλ- cells within the CD93+ gate) is indicated. B, right) The frequency of Igλ+ cells among mature recirculating B cells (B220hi CD93-) is shown. C) Bone marrow from mice backcrossed to the B6 background for 4-5 generations were stained and analyzed as in (A) and (B). The frequency of Igλ+ cells in each population is indicated. Each symbol represents an individual mouse, the bar the mean. \* p < 0.05, \*\* p < 0.01 by Student's t-test. D) Gating strategy for sorting of pre (B220+ CD93/AA4.1+ IgM-) and immature (B220+ CD93/AA4.1+ IgM+) B cells from bone marrow cells pre-enriched for B lineage cells with anti-B220 magnetic beads.

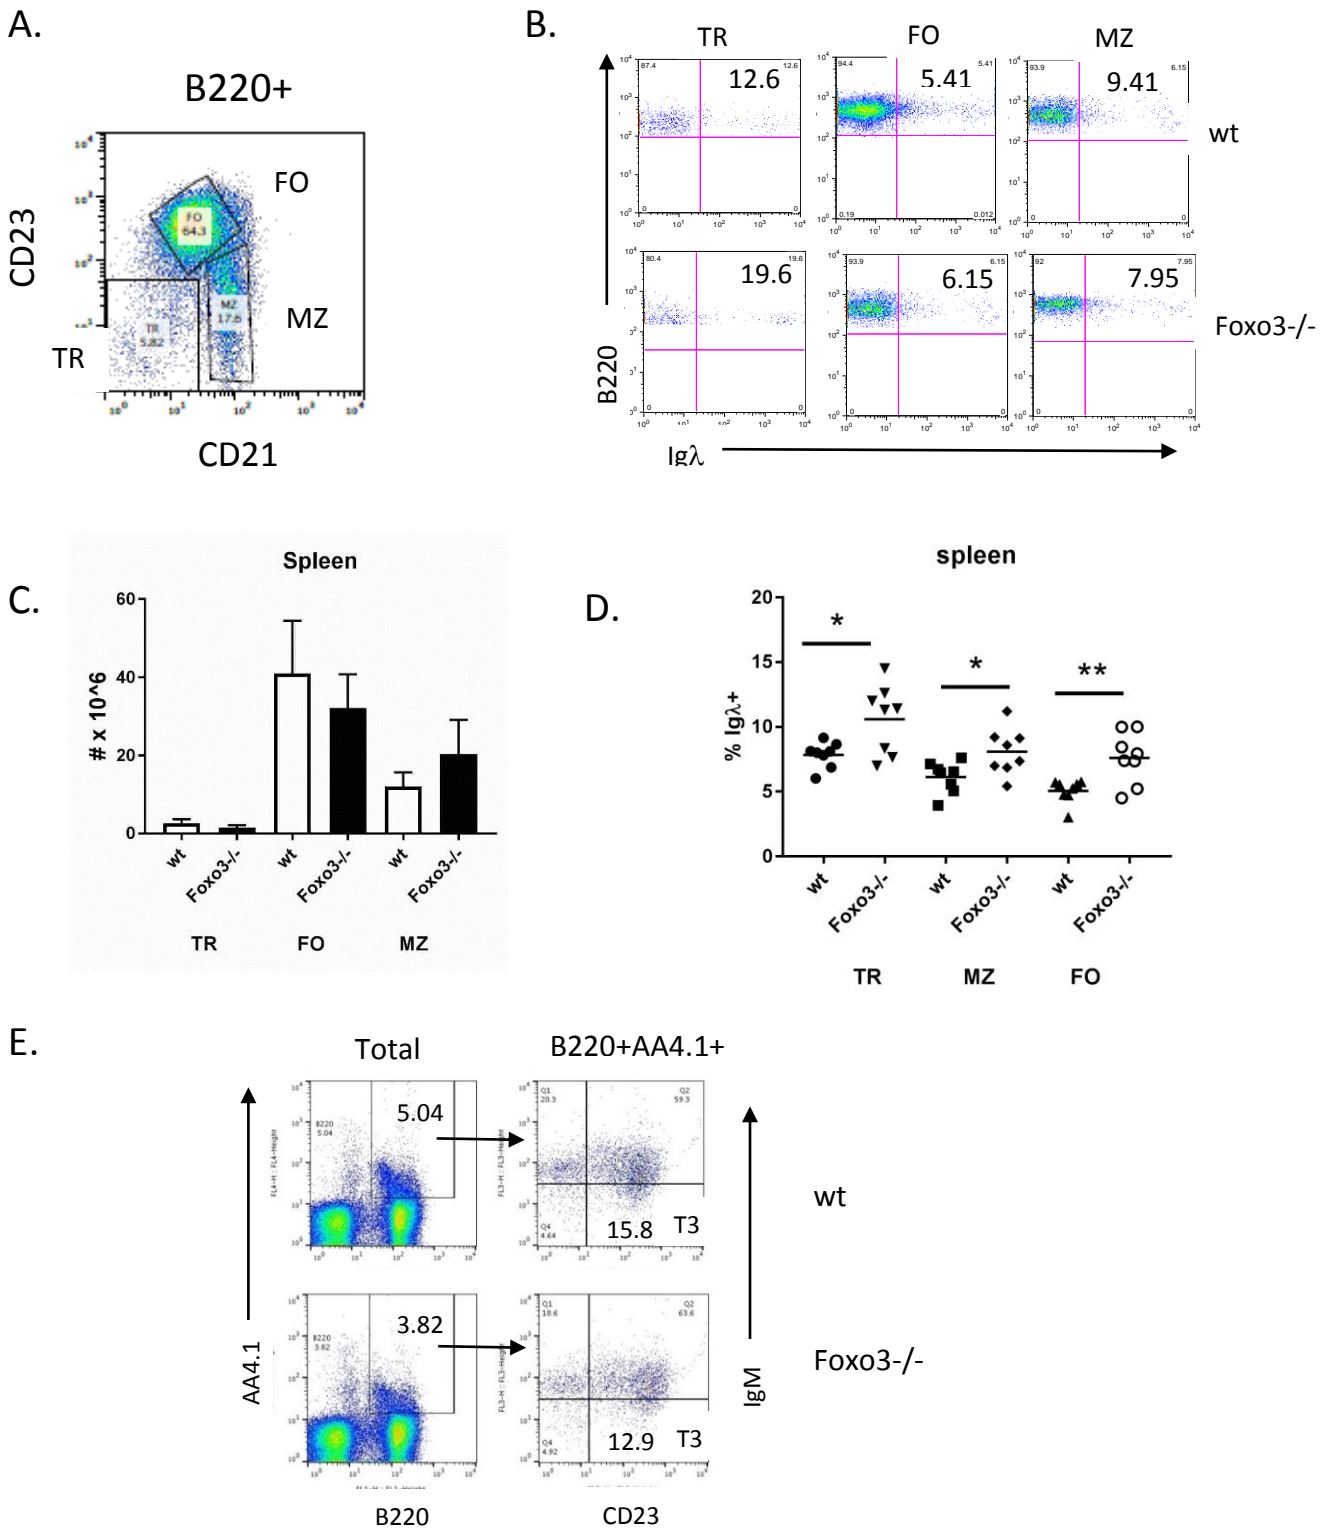

**Supplemental Figure 2: Representative FACS plots of spleen.** A, B, C) Splenocytes from mice on the FVB background were stained with antibodies against B220, CD23, CD21, and Igλ. B220<sup>+</sup> lymphocytes are shown in A). The populations indicated in A) were analyzed for Igλ expression in B). The frequency of Igλ<sup>+</sup> cells in each population is indicated. C) The total number of cells in the populations defined in (A) are shown as mean ± SD, n = 5. D) Splenocytes from mice backcrossed to the B6 background for 4-5 generations were stained and analyzed as in (A) and (B). The frequency of Igλ<sup>+</sup> cells in each population is indicated. Each symbol represents an individual mouse, the bar the mean. \* p < 0.05, \*\* p < 0.01 by Student's t-test. E) Gating strategy for T3 cells. Splenocytes from mice on the FVB background were stained with antibodies against B220, CD23, IgM, and AA4.1. T3 cells were identified as B220<sup>+</sup>AA4.1<sup>+</sup>CD23<sup>+</sup>IgM<sup>lo</sup>. Numbers indicate the percentage of cells in the gate or quadrant.
